# Supplementary material for: Real-life evaluation of histologic scores for Ulcerative Colitis in remission
Source: PubMed Central journal article supplement (PMC7939352; doi:10.1371/journal.pone.0248224), 2021-03-08
Supplement: pone.0248224.s001.pdf [file pone.0248224.s001.pdf]

**S1 Fig Difference between raters.** Significant difference between raters were tested with wilcoxon rank sum test with Benjamini-Hochberg adjusted p-values

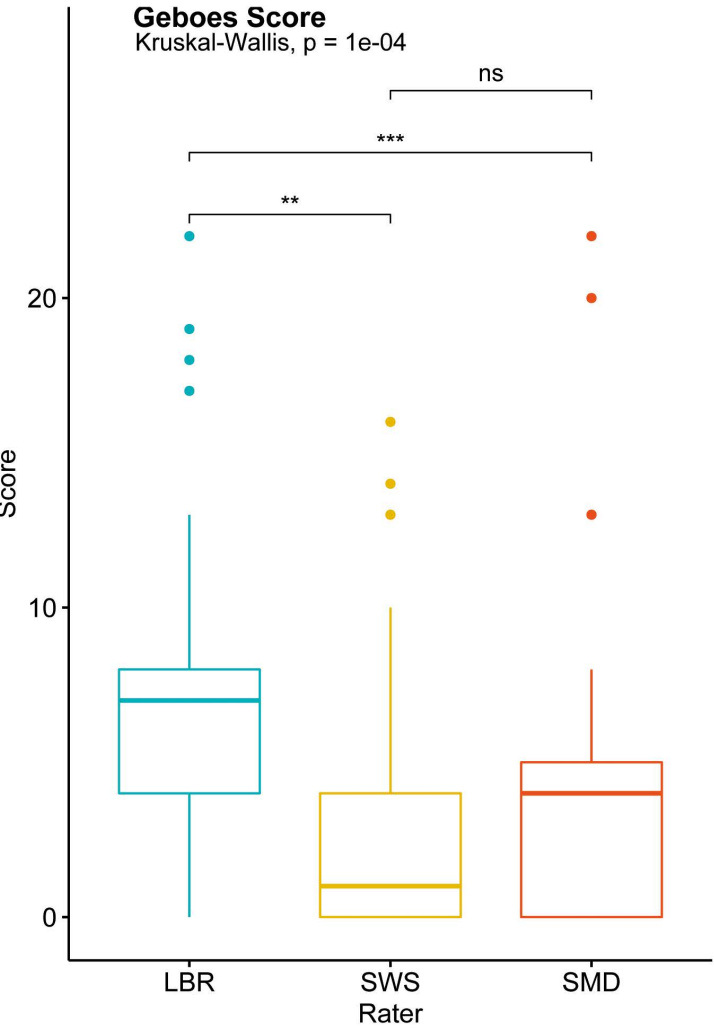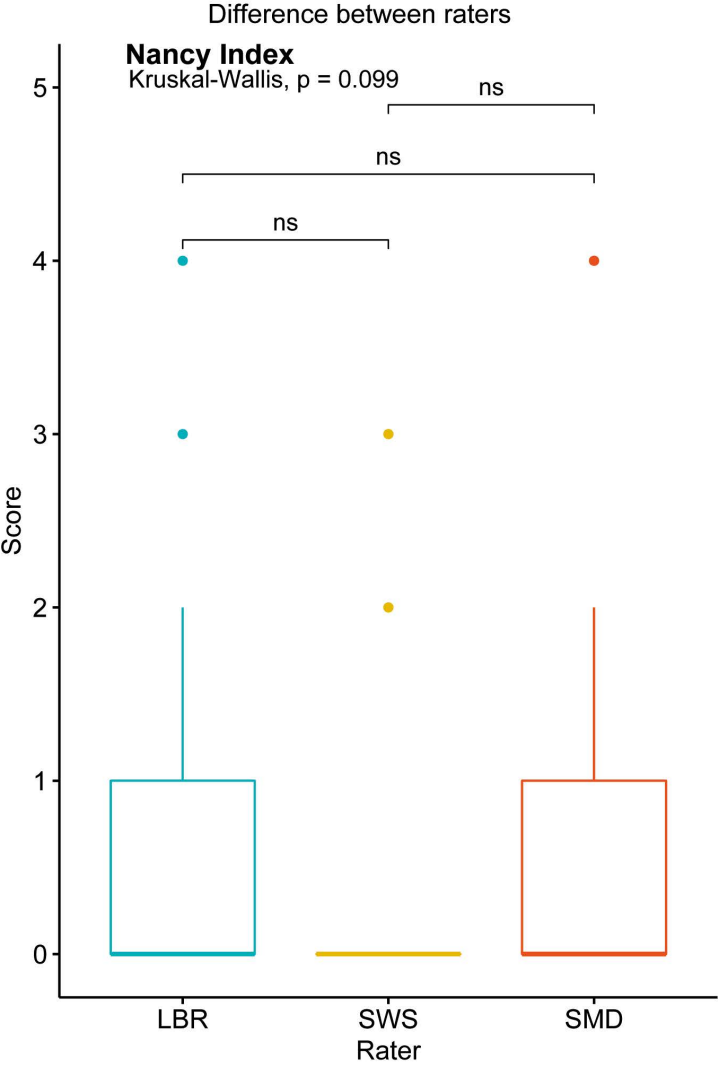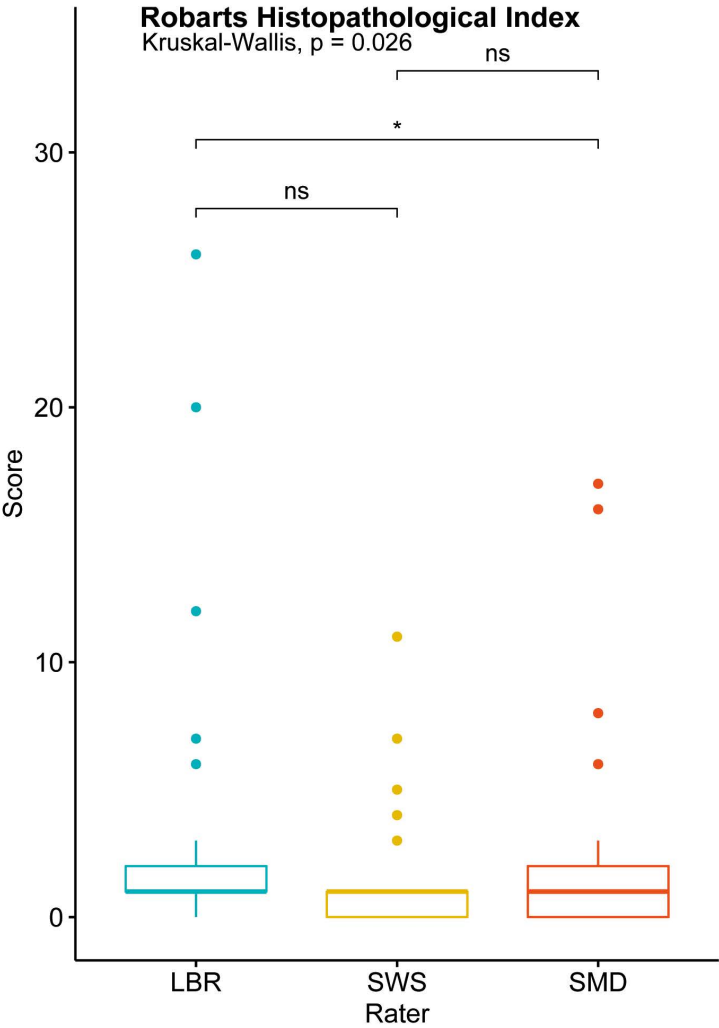

0.0001=\*\*\*\*, 0.001=\*\*\*, 0.01=\*\*, 0.05=\*, 1=ns
