# Supplementary material for: Real-life evaluation of histologic scores for Ulcerative Colitis in remission
Source: PubMed Central journal article supplement (PMC7939352; doi:10.1371/journal.pone.0248224), 2021-03-08

**S2 Fig Bar plot.** Difference in patients classified as remission or active according to relaxed or strict definition of remission

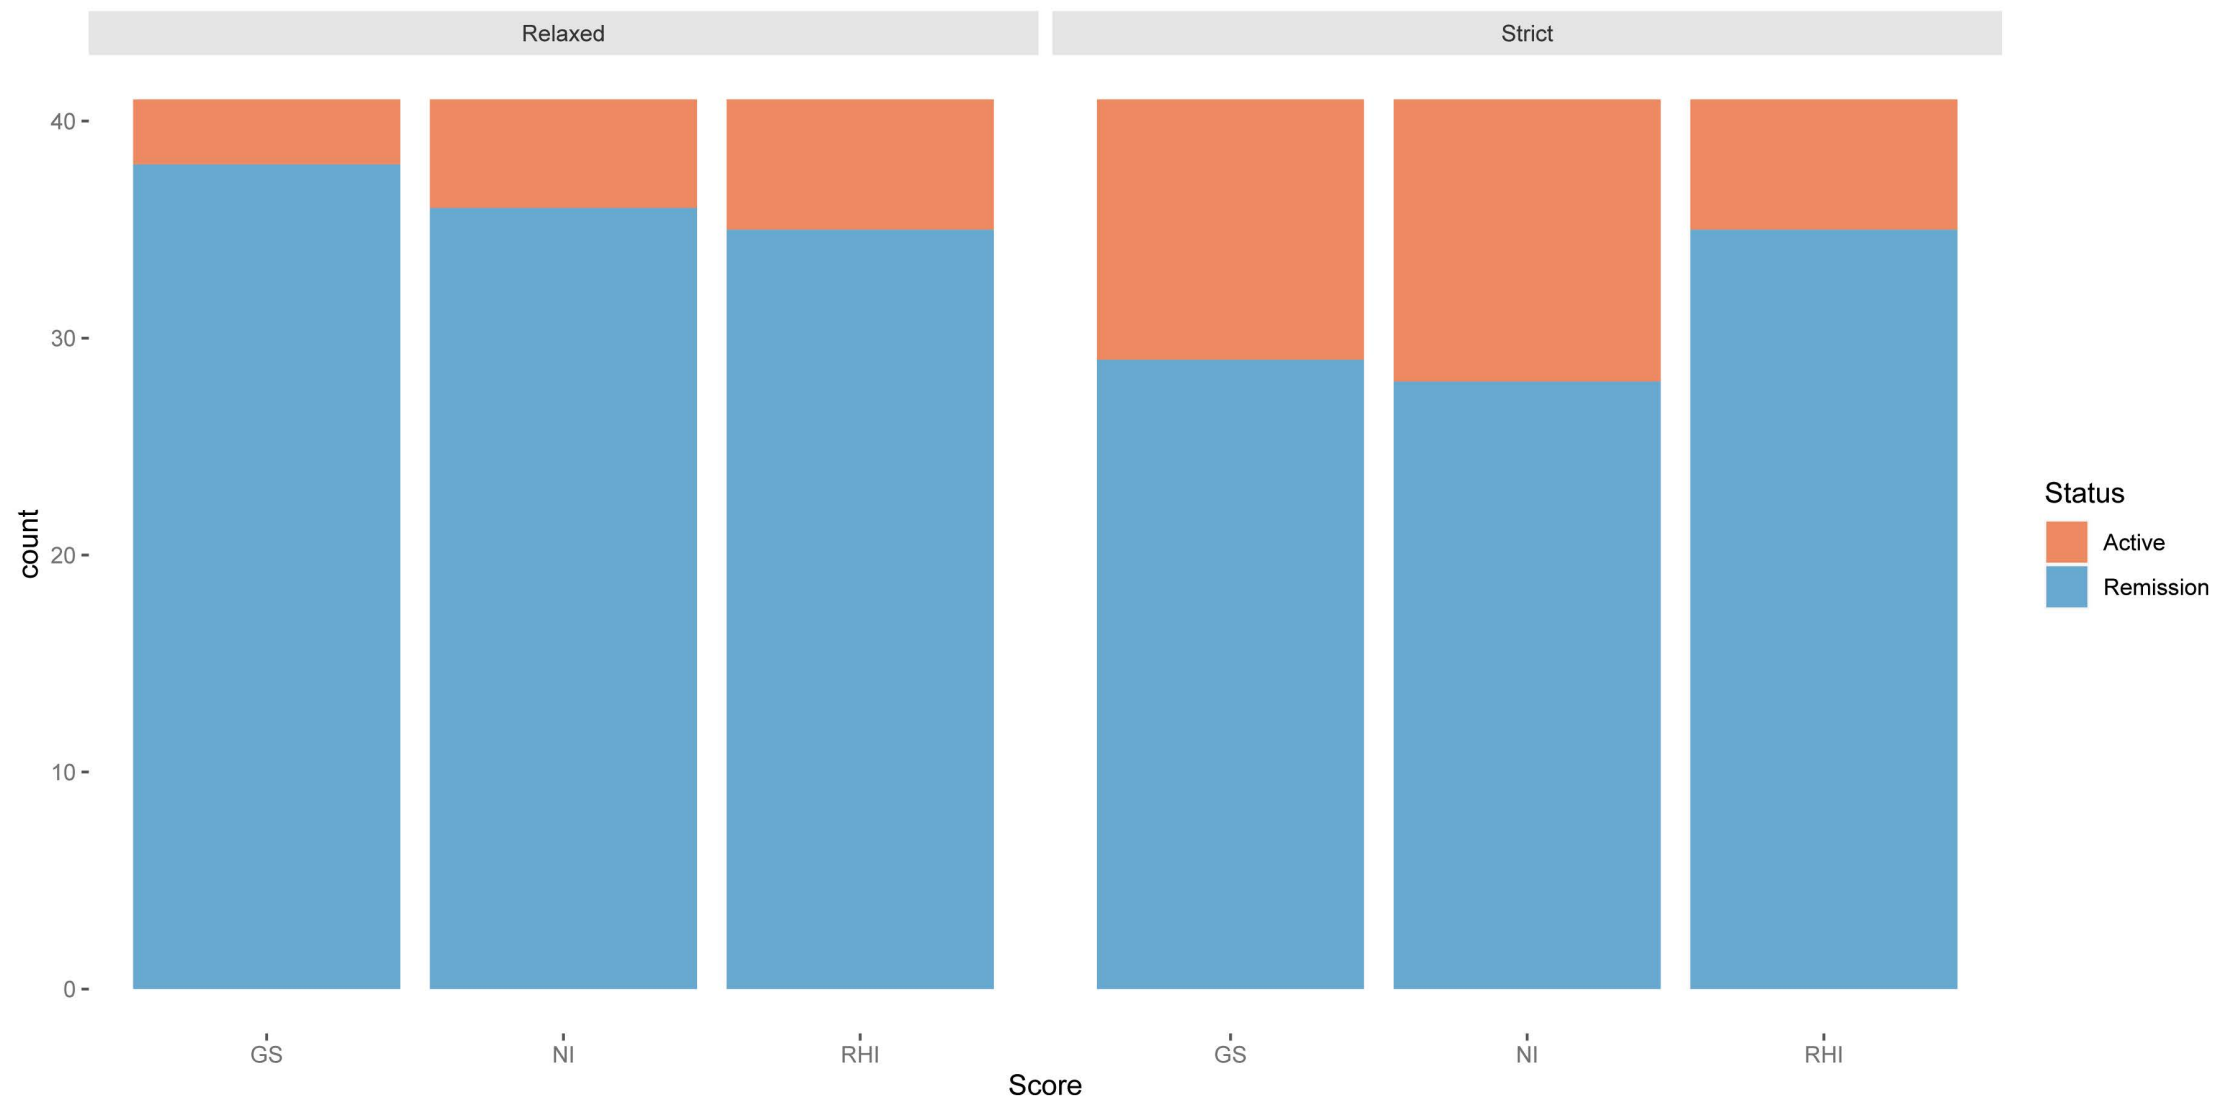

Supplement: pone.0248224.s002.pdf [file pone.0248224.s002.pdf]
