# Supplementary material for: Real-life evaluation of histologic scores for Ulcerative Colitis in remission
Source: PubMed Central journal article supplement (PMC7939352; doi:10.1371/journal.pone.0248224), 2021-03-08

**S3 Fig Histologic score by biopsy location.** No difference was found between biopsy locations

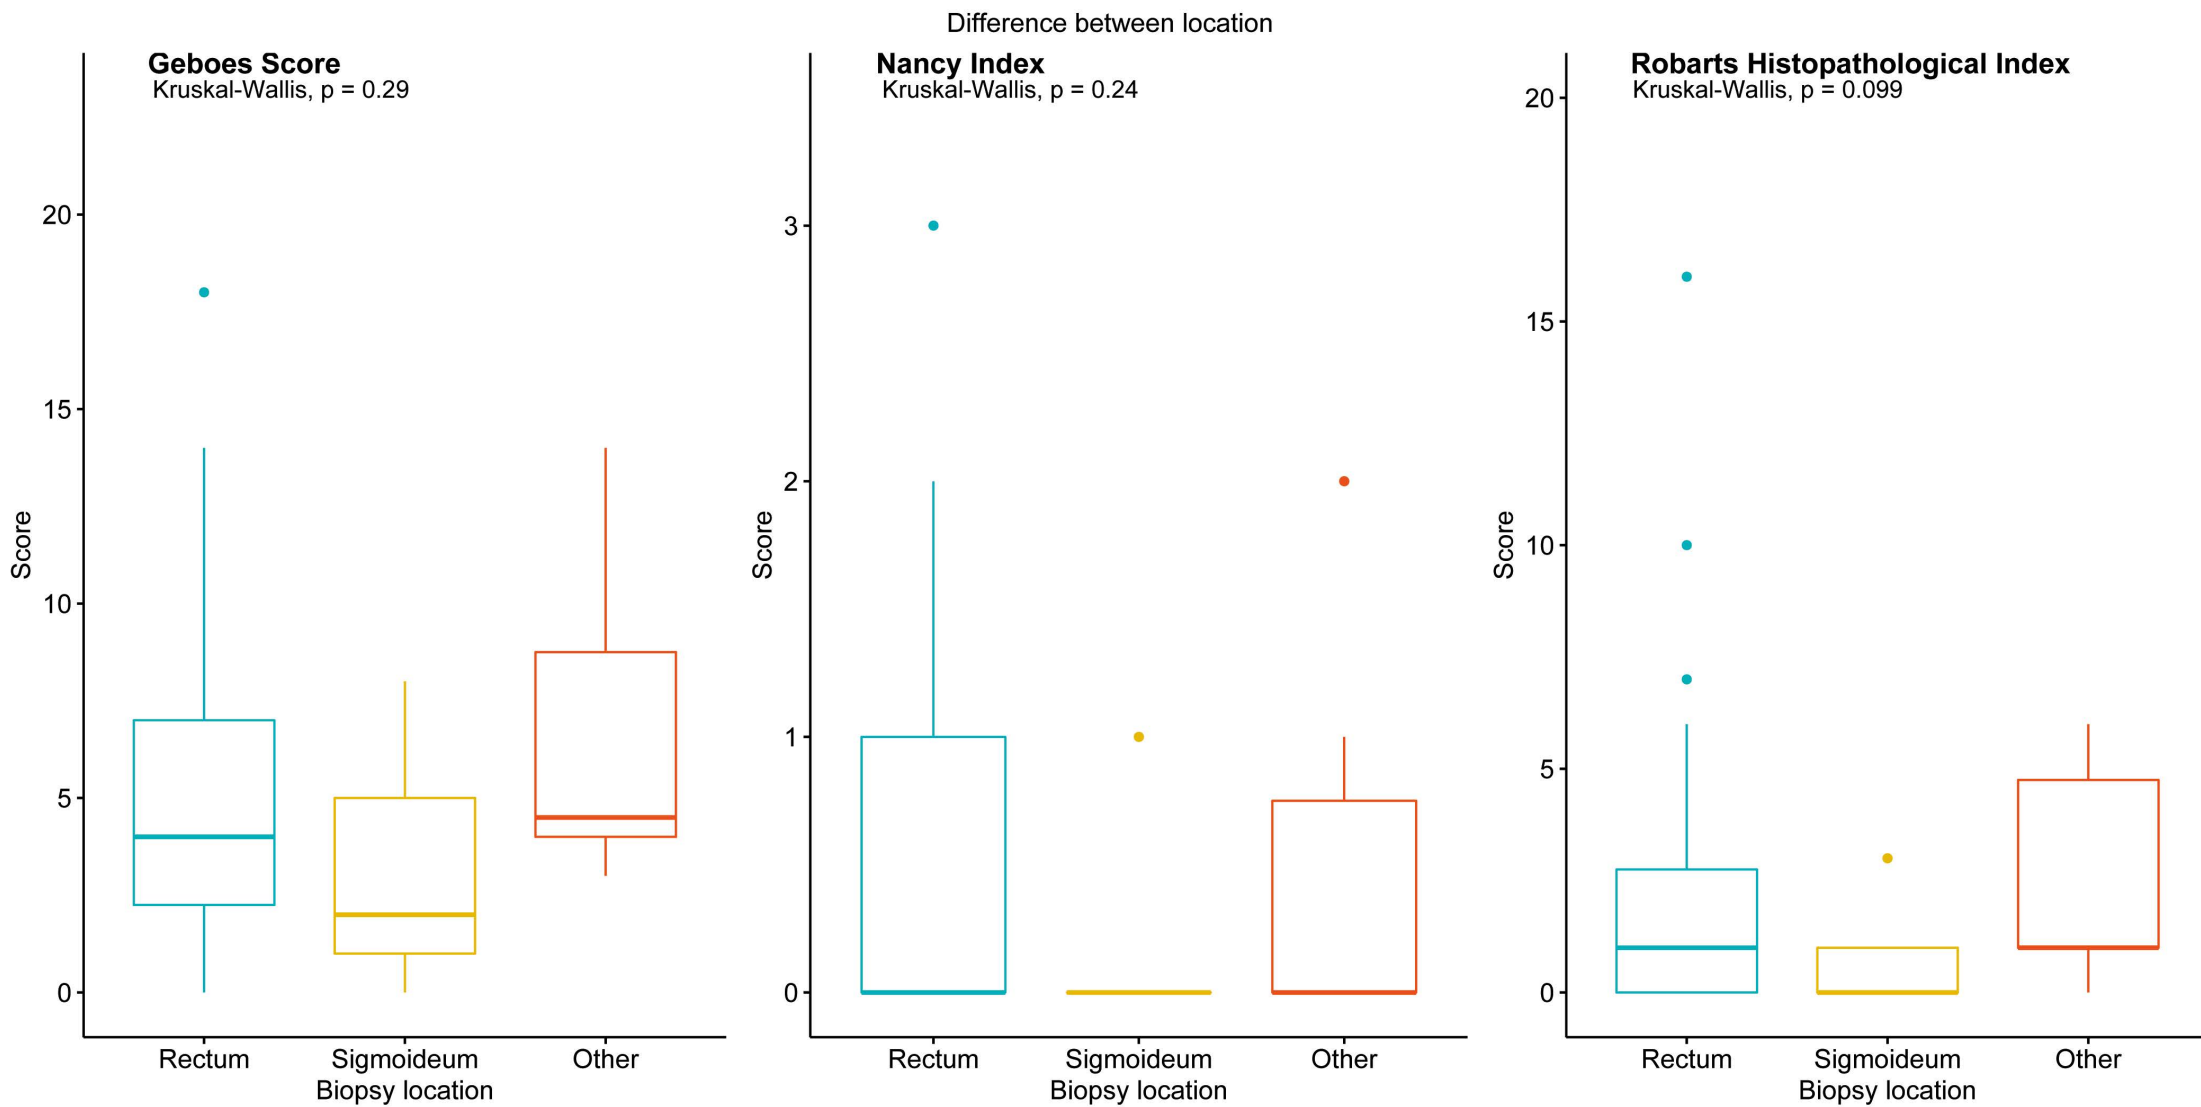

Supplement: pone.0248224.s003.pdf [file pone.0248224.s003.pdf]
